# Supplementary material
Source: publisher figshare collection journal article supplement (https://sage.figshare.com/ndownloader/files/23349722)
Supplement: Supplementary file 1 [file 23349722]

**Highlights:**

1. A 6-year follow-up study was performed to explore key factors for MCI progression.
2. About 17.5% MCI progressed to dementia and 80.7% MCI remained stable.
3. High education, nondiabetic, and as a technical staff prevented MCI progression.
